# Supplementary material for: Enzyme Activities of Five White-Rot Fungi in the Presence of Nanocellulose
Source: MDPI journal article supplement (doi:10.3390/jof7030222), 2021-03-18
Supplement: s1 [file s1]

**Table S1.** Various genes for laccase production found in the genome of *T. versicolor* and *T. pubescens* based on the UniProt server (uniprot.org).

| No. | UniProt KB identifier | Gene annotation  | UniProt protein name | Fungus               |
|-----|-----------------------|------------------|----------------------|----------------------|
| 1   | Q12718                | LAC2_TRAVE       | Laccase-2            | <i>T. versicolor</i> |
| 2   | Q12719                | LAC4_TRAVE       | Laccase-4            | <i>T. versicolor</i> |
| 3   | Q12717                | LAC5_TRAVE       | Laccase-5            | <i>T. versicolor</i> |
| 4   | Q96UT7                | Q96UT7_TRAVE     | Laccase B            | <i>T. versicolor</i> |
| 5   | Q96UK8                | Q96UK8_TRAVE     | Laccase 1            | <i>T. versicolor</i> |
| 6   | Q5IR80                | Q5IR80_TRAVE     | Laccase 1            | <i>T. versicolor</i> |
| 7   | O94222                | O94222_TRAVE     | Laccase              | <i>T. versicolor</i> |
| 8   | O13456                | O13456_TRAVE     | Laccase              | <i>T. versicolor</i> |
| 9   | O13448                | O13448_TRAVE     | Laccase              | <i>T. versicolor</i> |
| 10  | A0A5Q2UQV7            | A0A5Q2UQV7_TRAVE | Laccase              | <i>T. versicolor</i> |
| 11  | Q8TFM1                | Q8TFM1_TRAVE     | Laccase III          | <i>T. versicolor</i> |
| 12  | A0A144KZD6            | A0A144KZD6_TRAVE | Laccase              | <i>T. versicolor</i> |
| 13  | A0A144KZJ7            | A0A144KZJ7_TRAVE | Laccase              | <i>T. versicolor</i> |
| 14  | A0A144KZF3            | A0A144KZF3_TRAVE | Laccase              | <i>T. versicolor</i> |
| 15  | A0A481SVG9            | A0A481SVG9_TRAVE | Laccase              | <i>T. versicolor</i> |
| 16  | I6QS85                | 6QS85_TRAVE      | Laccase              | <i>T. versicolor</i> |
| 17  | Q50JG4                | Q50JG4_TRAVE     | Laccase3             | <i>T. versicolor</i> |
| 18  | Q50JG3                | Q50JG3_TRAVE     | Laccase4             | <i>T. versicolor</i> |
| 19  | Q50JG5                | Q50JG5_TRAVE     | Laccase2             | <i>T. versicolor</i> |
| 20  | Q50JG6                | Q50JG6_TRAVE     | Laccase1             | <i>T. versicolor</i> |
| 21  | G9M4T7                | G9M4T7_TRAVE     | Laccase 5            | <i>T. versicolor</i> |
| 22  | Q6KB01                | Q6KB01_TRAVE     | Laccase 4            | <i>T. versicolor</i> |
| 24  | B8Y3J5                | B8Y3J5_TRAVE     | Laccase protein      | <i>T. versicolor</i> |
| 26  | Q8TG94                | Q8TG94_TRAPU     | Laccase 2            | <i>T. pubescens</i>  |

|    |            |                  |            |                     |
|----|------------|------------------|------------|---------------------|
| 27 | Q8TG93     | Q8TG93_TRAPU     | Laccase 1A | <i>T. pubescens</i> |
| 28 | A0A1M2VSU5 | A0A1M2VSU5_TRAPU | Laccase-1  | <i>T. pubescens</i> |
| 29 | A0A1M2VJ73 | A0A1M2VJ73_TRAPU | Laccase-4  | <i>T. pubescens</i> |
| 30 | A0A1M2VJA1 | A0A1M2VJA1_TRAPU | Laccase-5  | <i>T. pubescens</i> |
| 31 | A0A1M2W0U1 | A0A1M2W0U1_TRAPU | Laccase-3  | <i>T. pubescens</i> |
| 32 | A0A1M2W307 | A0A1M2W307_TRAPU | Laccase    | <i>T. pubescens</i> |
| 33 | A0A1M2VWR1 | A0A1M2VWR1_TRAPU | Laccase-2  | <i>T. pubescens</i> |
